# Supplementary material for: Contrasting trends in light pollution across Europe based on satellite observed night time lights
Source: PubMed Central journal article supplement (PMC3896907; doi:10.1038/srep03789), 2014-01-21
Supplement: srep03789-s1.pdf [file srep03789-s1.pdf]

# **Contrasting trends in light pollution across Europe based on satellite observed night time lights**

Jonathan Bennie<sup>\*</sup>, Thomas W. Davies, James P. Duffy, Richard Inger and Kevin J. Gaston

Supplementary Information

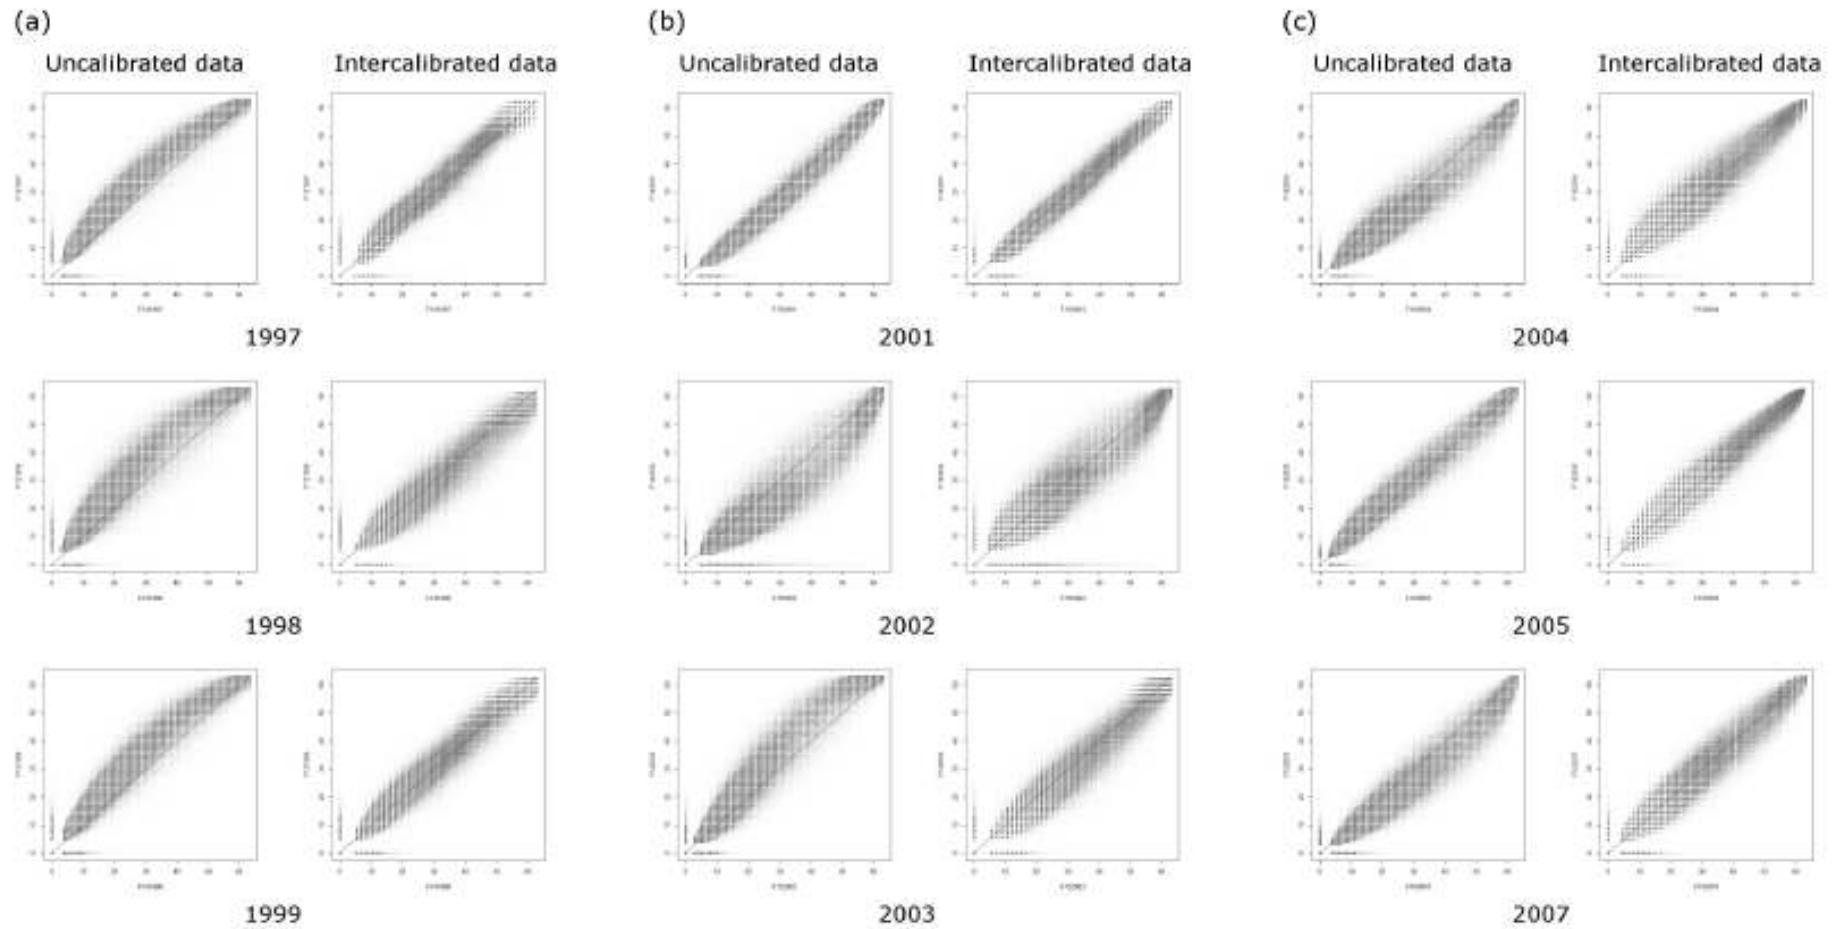

**Supplementary figure S1:** Scatter plots comparing nighttime light data for the same year but from different satellites for years in which two DMSP satellites were operational. (a) satellite F14 (x-axis) against F12 (y-axis); (b) satellite F15 (x-axis) against F14 (y-axis); (c) satellite F16 (x-axis) against F15 (y-axis). In each case the intercalibrated data increases provides a more linear fit and increases the consistency between datasets.

**Supplementary table S1:** comparison of mean error statistic for nighttime light data for the same year but from different satellites for years in which two DMSP satellites were operational.

| <b>Year</b> | <b>Satellite comparison</b> | <b>Uncalibrated mean error</b> | <b>Calibrated mean error</b> |
|-------------|-----------------------------|--------------------------------|------------------------------|
| 1997        | F12,F14                     | 1.04                           | 0.30                         |
| 1998        | F12,F14                     | 1.00                           | 0.03                         |
| 1999        | F12,F14                     | 0.74                           | -0.07                        |
| 2001        | F14,F15                     | -0.53                          | -0.21                        |
| 2002        | F14,F15                     | -0.87                          | -0.26                        |
| 2003        | F14,F15                     | 0.62                           | -0.32                        |
| 2004        | F15,F16                     | -0.52                          | 0.12                         |
| 2005        | F15,F16                     | 0.05                           | -0.01                        |
| 2007        | F15,F16                     | -0.62                          | -0.04                        |
